# Supplementary material
Source: publisher site journal article supplement (https://www.spandidos-publications.com/2240/downloadSupplementary)
Supplement: Supplementary file 1 [file downloadSupplementary]

Figure S1. Cell cycle analysis and miR-516b-5p overexpression. (A) FEZF1-AS1-knockdown induced G<sub>2</sub>/M arrest in both H1299 and H520 cells. (B) ITGA11-knockdown did not influence the cell cycle. (C) miR-516b-5p was overexpressed in H1299 and H520 cells using miR-516b mimics. Data are presented as the mean  $\pm$  SEM. \*\*\*P<0.001 vs. NC. ITGA11, integrin subunit  $\alpha$ 11; NC, negative control; si, small interfering; FEZF1-AS1, FEZ family zinc finger 1 antisense RNA 1; miR, microRNA; FC, fold-change.

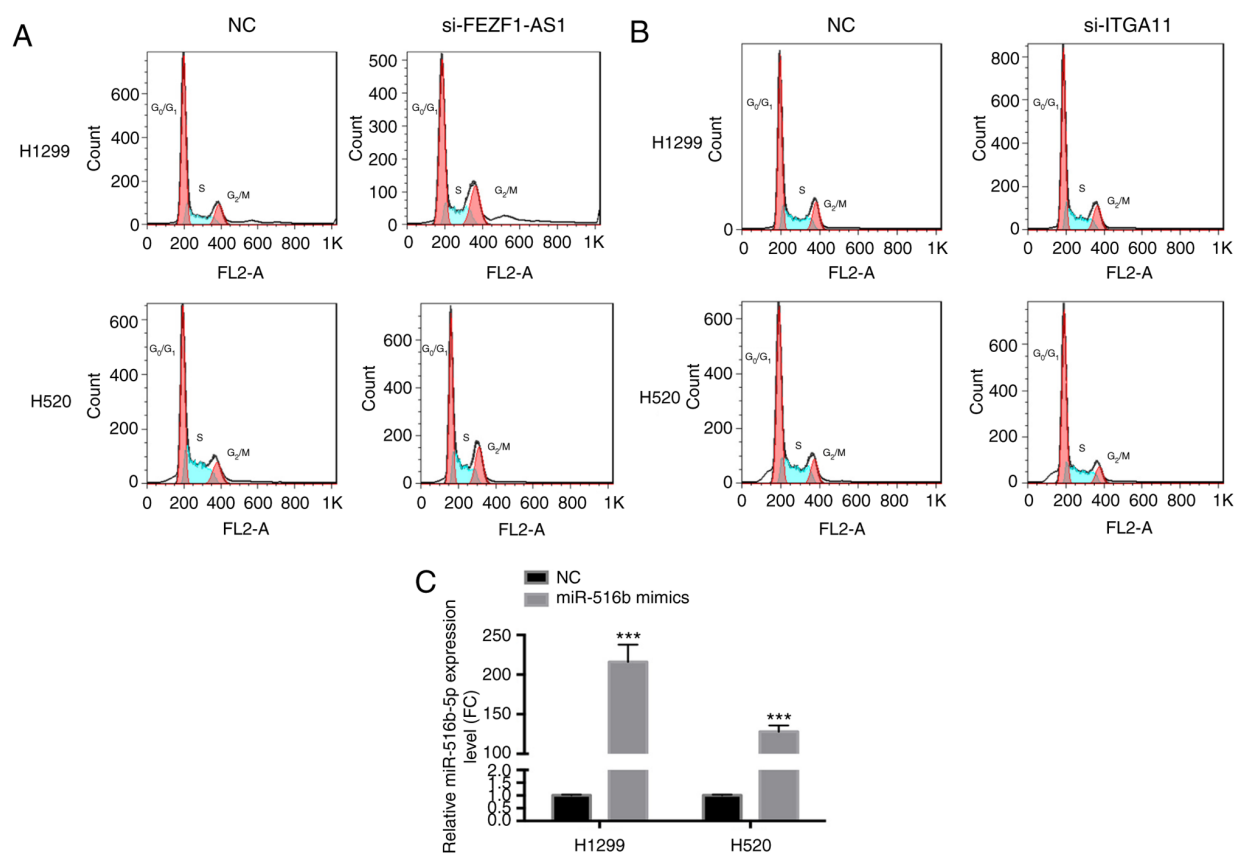



Table SI. Details of the pathology, smoking history, molecular classification (EGFR, ALK, PD-1 and PD-L1) of the 45 patients with non-small cell lung cancer.

| Samples | FEZF1-AS1 expression <sup>a</sup> | Pathological diagnosis <sup>b</sup> | Smoking cigarettes/day | Smoking time, years | Smoking index <sup>c</sup> | Smoking <sup>c</sup> | Family history | EGFR mutation <sup>d</sup> | ALK <sup>d</sup> | PD-1, % <sup>e</sup> | PD-L1, % <sup>e</sup> |
|---------|-----------------------------------|-------------------------------------|------------------------|---------------------|----------------------------|----------------------|----------------|----------------------------|------------------|----------------------|-----------------------|
| 1       | High                              | AD                                  | 10                     | 30                  | 300                        | 1                    | No             | /                          | /                | /                    | /                     |
| 2       | High                              | AD                                  | 50                     | 20                  | 1,000                      | 2                    | No             | /                          | /                | /                    | /                     |
| 3       | High                              | SCC                                 | 10                     | 40                  | 400                        | 2                    | Yes            | /                          | /                | /                    | /                     |
| 4       | Low                               | AD                                  | 0                      | 0                   | 0                          | 0                    | No             | /                          | /                | /                    | /                     |
| 5       | Low                               | AD                                  | 20                     | 20                  | 400                        | 2                    | No             | /                          | /                | /                    | /                     |
| 6       | Low                               | SCC                                 | 0                      | 0                   | 0                          | 0                    | No             | /                          | /                | /                    | /                     |
| 7       | High                              | AD                                  | 10                     | 30                  | 300                        | 1                    | No             | /                          | /                | /                    | /                     |
| 8       | Low                               | AD                                  | 10                     | 20                  | 200                        | 1                    | No             | /                          | /                | /                    | /                     |
| 9       | Low                               | Atypical                            | 0                      | 0                   | 0                          | 0                    | No             | /                          | /                | /                    | /                     |
| 10      | Low                               | SCC                                 | 20                     | 40                  | 800                        | 2                    | No             | /                          | /                | /                    | /                     |
| 11      | Low                               | AD                                  | 20                     | 40                  | 800                        | 2                    | No             | /                          | /                | /                    | /                     |
| 12      | High                              | AD                                  | 0                      | 0                   | 0                          | 0                    | No             | /                          | /                | /                    | /                     |
| 13      | High                              | AD                                  | 0                      | 0                   | 0                          | 0                    | No             | /                          | /                | /                    | /                     |
| 14      | Low                               | AD                                  | 0                      | 0                   | 0                          | 0                    | No             | /                          | /                | /                    | /                     |
| 15      | Low                               | AD                                  | 0                      | 0                   | 0                          | 0                    | No             | /                          | /                | /                    | /                     |
| 16      | High                              | AD                                  | 0                      | 0                   | 0                          | 0                    | No             | /                          | /                | /                    | /                     |
| 17      | Low                               | AD                                  | 10                     | 40                  | 400                        | 2                    | No             | /                          | /                | /                    | /                     |
| 18      | Low                               | SCC                                 | 20                     | 40                  | 800                        | 2                    | No             | /                          | /                | /                    | /                     |
| 19      | Low                               | SCC                                 | 20                     | 40                  | 800                        | 2                    | No             | /                          | /                | /                    | /                     |
| 20      | High                              | AD                                  | 40                     | 20                  | 800                        | 2                    | No             | /                          | /                | /                    | /                     |
| 21      | High                              | SCC                                 | 20                     | 30                  | 600                        | 2                    | No             | /                          | /                | /                    | /                     |
| 22      | Low                               | AD                                  | 40                     | 40                  | 1,600                      | 2                    | No             | -                          | -                | 0                    | 0                     |
| 23      | High                              | SCC                                 | 0                      | 0                   | 0                          | 0                    | No             | -                          | -                | 0                    | 0                     |
| 24      | High                              | AD                                  | 0                      | 0                   | 0                          | 0                    | Yes            | E19                        | -                | 0                    | 0                     |
| 25      | Low                               | AD                                  | 20                     | 30                  | 600                        | 2                    | No             | /                          | /                | /                    | /                     |
| 26      | High                              | SCC                                 | 60                     | 30                  | 1,800                      | 2                    | No             | -                          | -                |                      |                       |
| 27      | Low                               | AD                                  | 0                      | 0                   | 0                          | 0                    | No             | /                          | /                | /                    | /                     |
| 28      | High                              | AD                                  | 20                     | 30                  | 600                        | 2                    | No             | /                          | /                | /                    | /                     |
| 29      | High                              | SCC                                 | 40                     | 35                  | 1,400                      | 2                    | No             | -                          | -                | 0                    | 40                    |
| 30      | High                              | AD                                  | 20                     | 50                  | 1,000                      | 2                    | No             | -                          | -                | 0                    | 0                     |
| 31      | High                              | SCC                                 | 0                      | 0                   | 0                          | 0                    | No             | /                          | /                | /                    | /                     |
| 32      | Low                               | AD                                  | 20                     | 30                  | 600                        | 2                    | Yes            | -                          | -                | 0                    | 0                     |
| 33      | High                              | SCC                                 | 40                     | 40                  | 1,600                      | 2                    | Yes            | /                          | /                | /                    | /                     |
| 34      | Low                               | SCC                                 | 60                     | 30                  | 1,800                      | 2                    | No             | /                          | /                | /                    | /                     |
| 35      | Low                               | SCC                                 | 0                      | 0                   | 0                          | 0                    | No             | /                          | /                | /                    | /                     |
| 36      | Low                               | AD                                  | 10                     | 20                  | 200                        | 1                    | No             | /                          | /                | /                    | /                     |
| 37      | High                              | SCC                                 | 10                     | 30                  | 300                        | 1                    | No             | /                          | /                | /                    | /                     |
| 38      | High                              | SCC                                 | 20                     | 30                  | 600                        | 2                    | No             | /                          | /                | /                    | /                     |
| 39      | Low                               | SCC                                 | 30                     | 30                  | 900                        | 2                    | No             | /                          | /                | /                    | /                     |
| 40      | High                              | SCC                                 | 20                     | 40                  | 800                        | 2                    | Yes            | /                          | /                | /                    | /                     |
| 41      | Low                               | AD                                  | 10                     | 40                  | 400                        | 2                    | No             | /                          | /                | /                    | /                     |
| 42      | Low                               | AD                                  | 40                     | 30                  | 1,200                      | 2                    | No             | /                          | /                | /                    | /                     |
| 43      | High                              | AD                                  | 0                      | 0                   | 0                          | 0                    | No             | /                          | /                | /                    | /                     |
| 44      | High                              | AD                                  | 20                     | 20                  | 400                        | 2                    | No             | /                          | /                | /                    | /                     |
| 45      | High                              | AD                                  | 0                      | 0                   | 0                          | 0                    | Yes            | E21                        | /                | /                    | /                     |

<sup>a</sup>FEZF1-AS1 was divided into low and high expression groups based on the median of FEZF1-AS1 expression. <sup>b</sup>Samples included 17 SCC, 27 AD and 1 atypical carcinoid. <sup>c</sup>Smoking index=cigarettes/day x smoking time (years). Since a smoking index  $\geq 400$  indicated a high risk of lung cancer, patients were divided into never smokers (0, smoking index=0), light smokers (1, smoking index <400) and heavy smokers (2, smoking index  $\geq 400$ ). <sup>d</sup>EGFR was detected via PCR, and ALK was detected via fluorescence *in situ* hybridization by the Department of Pathology of the Fourth Hospital of Hebei Medical University. /, did not test; -, negative mutation. <sup>e</sup>Percentage of positive cells. PD-1 and PD-L1 were detected via immunohistochemistry by the Department of Pathology of the Fourth Hospital of Hebei Medical University. /, did not test; 0, no expression. These procedures were performed according to routine hospital protocols. FEZF1-AS1, FEZ family zinc finger 1 antisense RNA 1; ALK, anaplastic lymphoma kinase; PD-1, programmed cell death 1; PD-L1, programmed death-ligand 1; SCC, squamous cell carcinoma; AD, adenocarcinoma.
